# Supplementary material
Source: Springer Nature journal article supplement (https://www.springermedizin.de/resource/supplementary/12889_2012_5336_MOESM4_ESM.pdf/9495124)

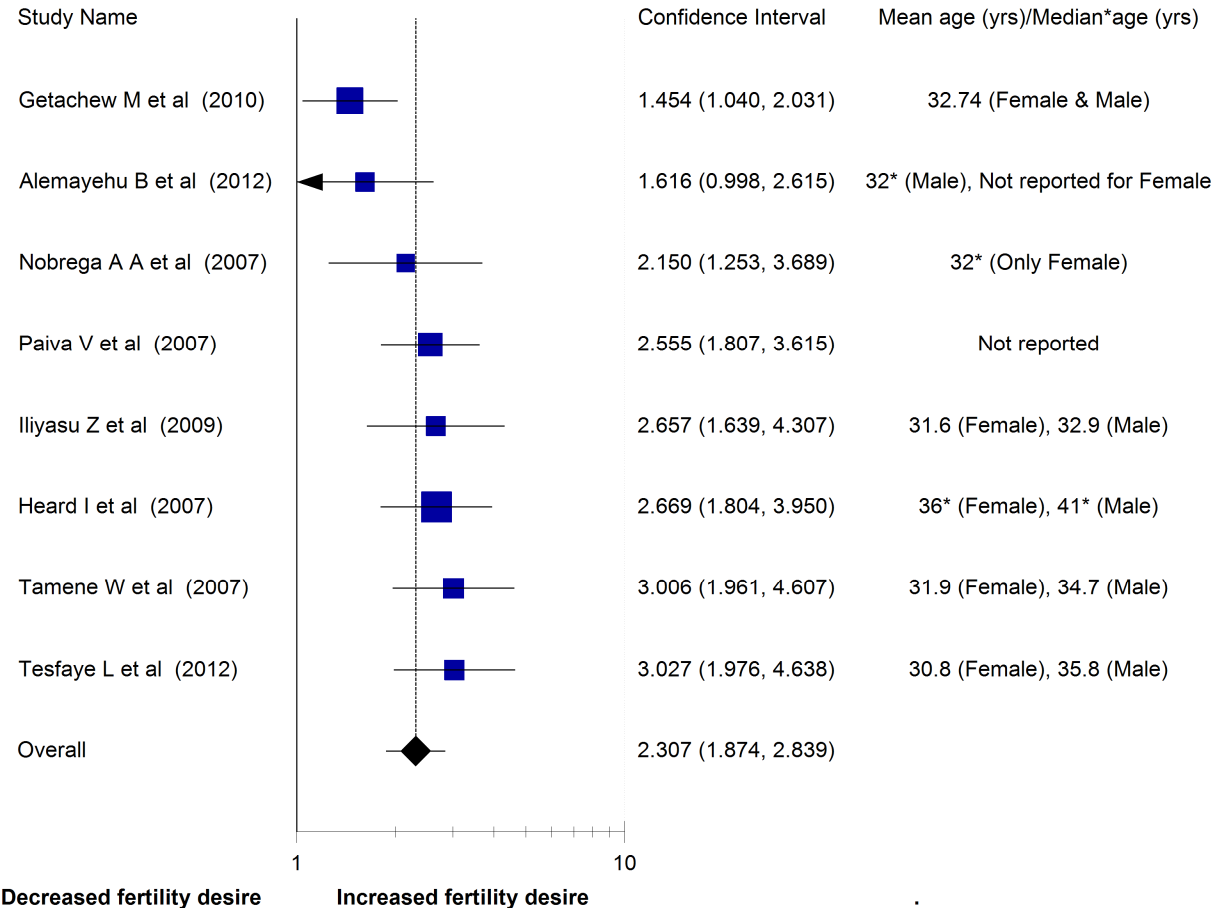

| Heterogeneity    |                |        |       |           |
|------------------|----------------|--------|-------|-----------|
| Tau <sup>2</sup> | I <sup>2</sup> | Q      | DF    | P-val (Q) |
| 0.043            | 48.9%          | 13.700 | 7.000 | 0.057     |

Supplement: MOESM4 [file 9495124]
